# Supplementary material for: Transmembrane domain-mediated Lck association underlies bystander and costimulatory ICOS signaling
Source: PubMed Central journal article supplement (PMC7000777; doi:10.1038/s41423-018-0183-z), 2018-12-06
Supplement: 41423_2018_183_MOESM1_ESM.pdf [file 41423_2018_183_MOESM1_ESM.pdf]

**Figure S1**

|                            | Extracellular domain | Transmembrane domain    | Intracellular domain                      |
|----------------------------|----------------------|-------------------------|-------------------------------------------|
| ICOS                       | ...WL                | PVGCAAFVVVLLFGCIIWF     | SKKKY...YMFM...                           |
| ICOS-CD44TM                | ...WL                | WLIIASLLALALILAVCIAVNS  | SKKKY...YMFM                              |
| ICOS-NT                    | ...WL                | PVGCAAFVVVLLFGCIIWF     | SK                                        |
| ICOS-CD44TM-NT             | ...WL                | WLIIASLLALALILAVCIAVNS  | SK                                        |
| ICOS-Ly108TM-NT            | ...WL                | AVWFMTTISIISAVILFVCWSI  | SK                                        |
| ICOS-H2KbTM-NT             | ...WL                | ATVAVLVVLGAAIVTGAVVAFVM | SK                                        |
| ICOS-SLAMTM-NT             | ...WL                | WMQYTLVPLGVVIFILVFTAI   | SK                                        |
| ICOS-NT-hTM                | ...WL                | PIGCAAFVVVCILGCILICWL   | SK                                        |
| ICOS-170 <sup>YF</sup>     | ...WL                | PVGCAAFVVVLLFGCIIWF     | SKKK <sup>F</sup> ...YMFM...              |
| ICOS-181 <sup>YF</sup>     | ...WL                | PVGCAAFVVVLLFGCIIWF     | SKKKY... <sup>F</sup> MFM...              |
| ICOS-170-181 <sup>YF</sup> | ...WL                | PVGCAAFVVVLLFGCIIWF     | SKKK <sup>F</sup> ... <sup>F</sup> MFM... |
