# Supplementary material for: Transmembrane domain-mediated Lck association underlies bystander and costimulatory ICOS signaling
Source: PubMed Central journal article supplement (PMC7000777; doi:10.1038/s41423-018-0183-z), 2018-12-06

**Figure S3**

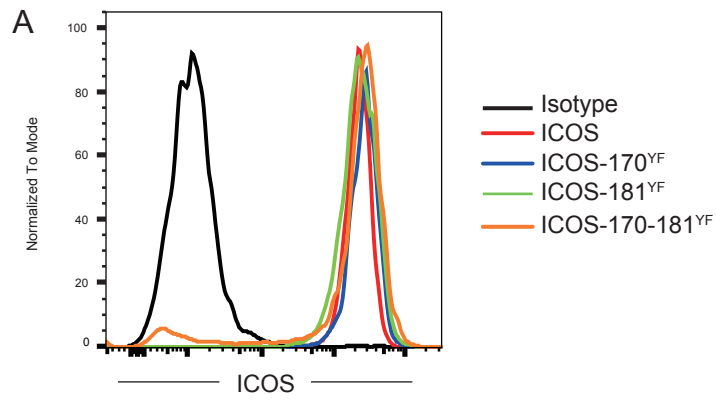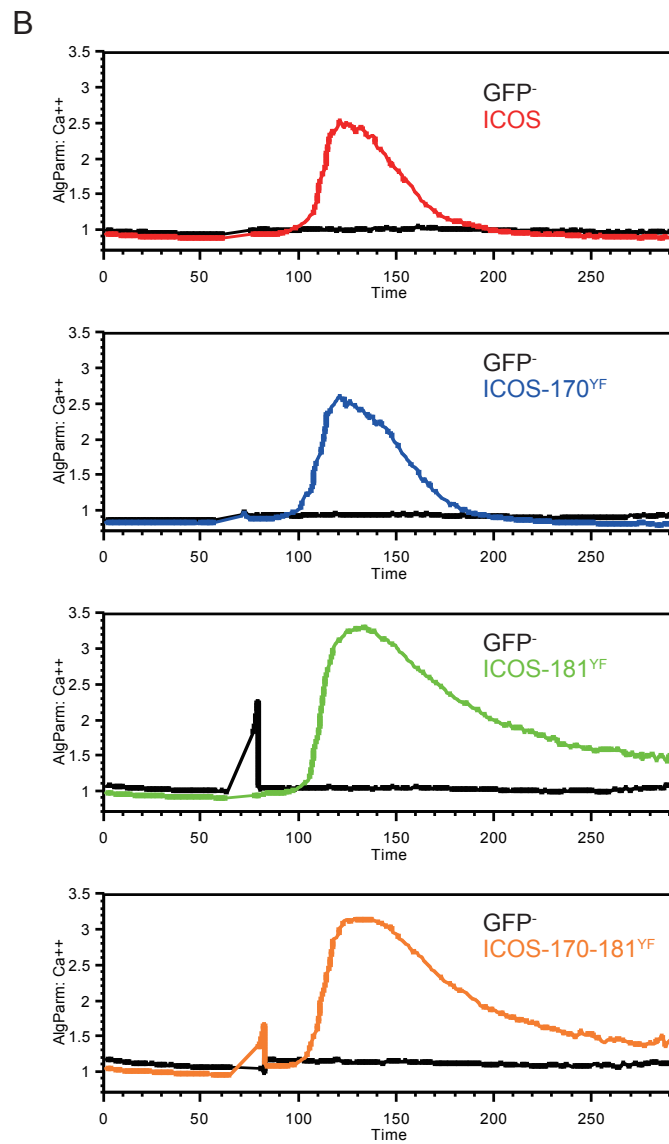

Supplement: 41423_2018_183_MOESM3_ESM.pdf [file 41423_2018_183_MOESM3_ESM.pdf]
